# Supplementary material for: Calcium Ion Flow Permeates Cells through SOCs to Promote Cathode-Directed Galvanotaxis
Source: PLoS One. 2015 Oct 8;10(10):e0139865. doi: 10.1371/journal.pone.0139865 (PMC4598171; doi:10.1371/journal.pone.0139865)
Supplement: S1 Table — (XLSX) [file pone.0139865.s008.xlsx]

## Sheet: Sheet1
S1 Table. Raw data of Fig 1D.
voltage (V)		current(mA)
system	chamber
5	2.8	0.046
10	4	0.101
20	6.4	0.225
30	8.8	0.358
40	11.1	0.489
50	13.4	0.623
60	15.9	0.765
